# Supplementary material for: Apparent source levels and active communication space of whistles of free-ranging Indo-Pacific humpback dolphins (Sousa chinensis) in the Pearl River Estuary and Beibu Gulf, China
Source: PubMed Central journal article supplement (PMC4756734; doi:10.7717/peerj.1695), 2016-02-15

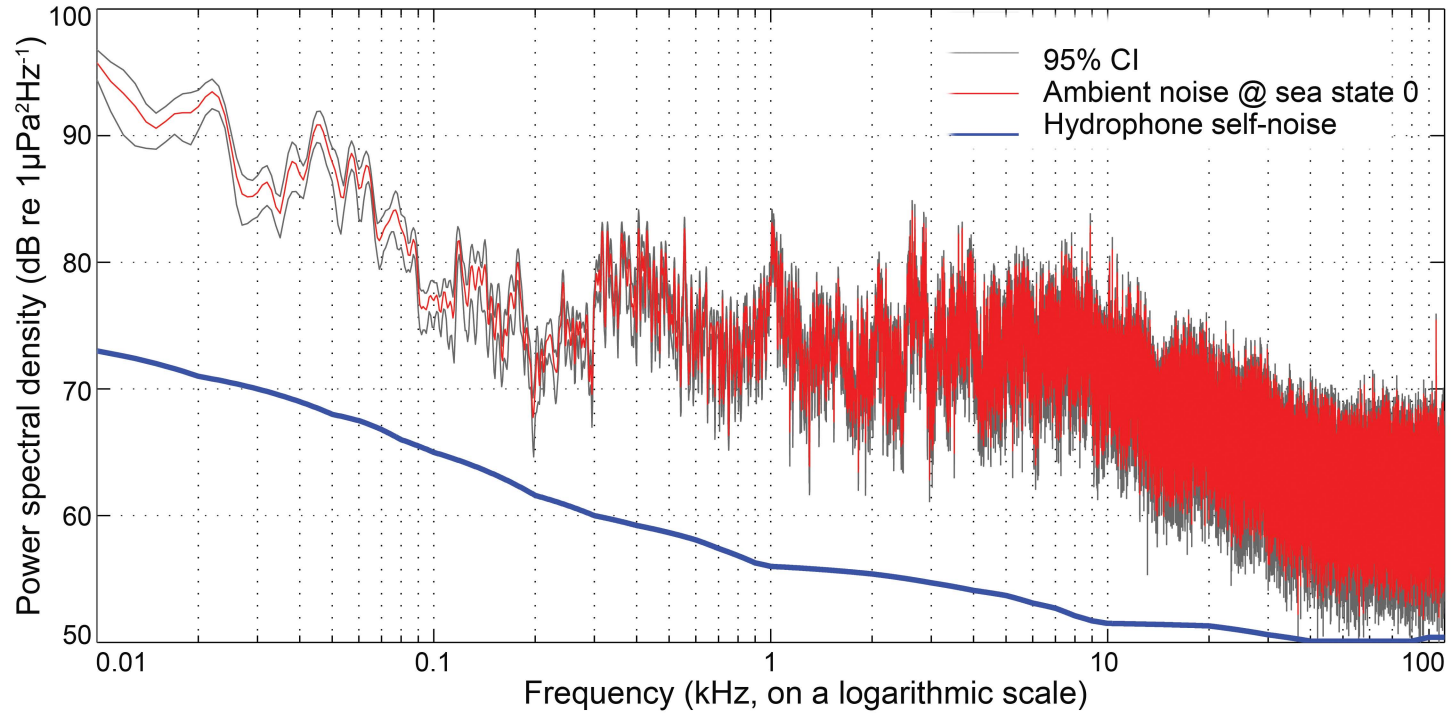

Supplement: peerj-04-1695-s001.pdf [file peerj-04-1695-s001.pdf]
